# Supplementary material for: Association of Fc Gamma Receptor 3B Gene Copy Number Variation with Rheumatoid Arthritis Susceptibility
Source: MDPI journal article supplement (doi:10.3390/genes13122238), 2022-11-29
Supplement: s1 [file s1]

**Supplementary Text:** Padded amplicon, where the context sequence surrounding the TaqMan® probe is shown in brackets.

```
>hg38_dna range=chr1:161626829-161627031 5'pad=0 3'pad=0 strand=+ repeatMasking=none  
GAATAGGCAATCAAAGGAATATTGAAAGACTCTTGTGGCCTTCAGGAATAAGCTGACGGTCGCCACAGA  
GTGGCTGCAGAAATTGTGA[AGGAGAACTAACTCAATGTAAACAT]CAGGGTGGCGAAGGGCGGGACT  
GGTAGTGCTCAGAGTGGCAATTCGTGGTTTCTAAGGTGTCACAGGGCCTCGGTGAGACCAACTTTATT
```

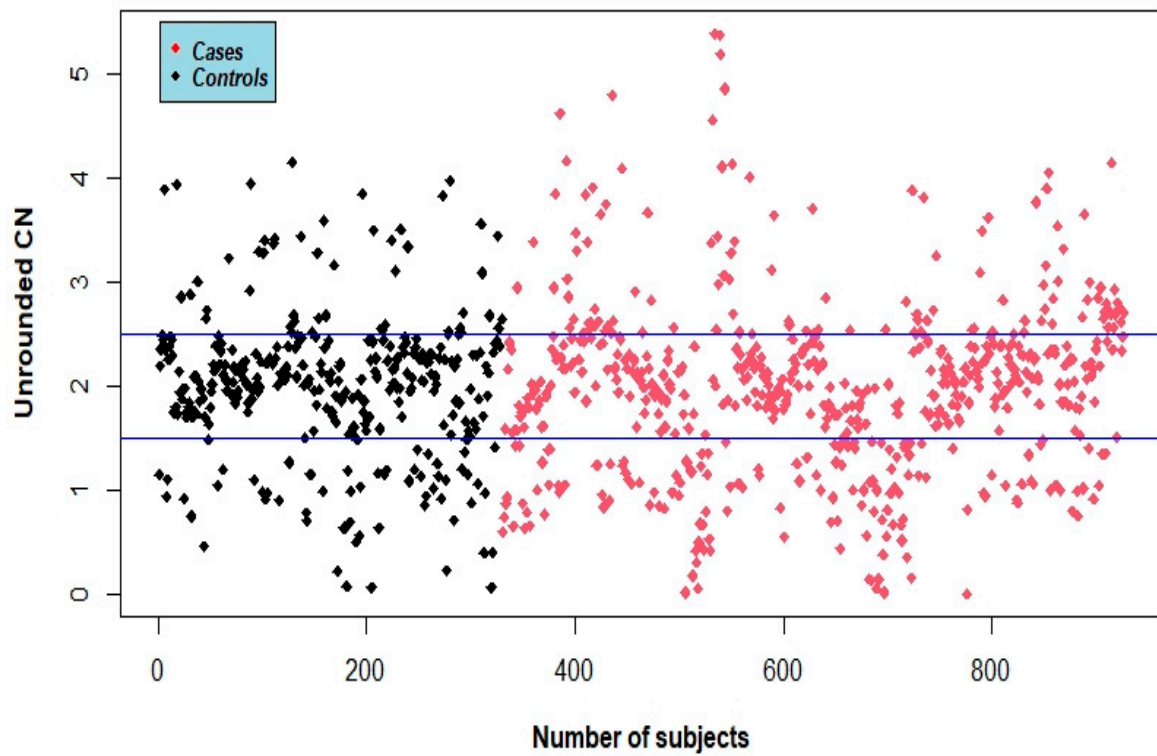

**Supplementary Figure S1:** Scatter plot of unrounded CNV. Cases and controls are color coded differently.

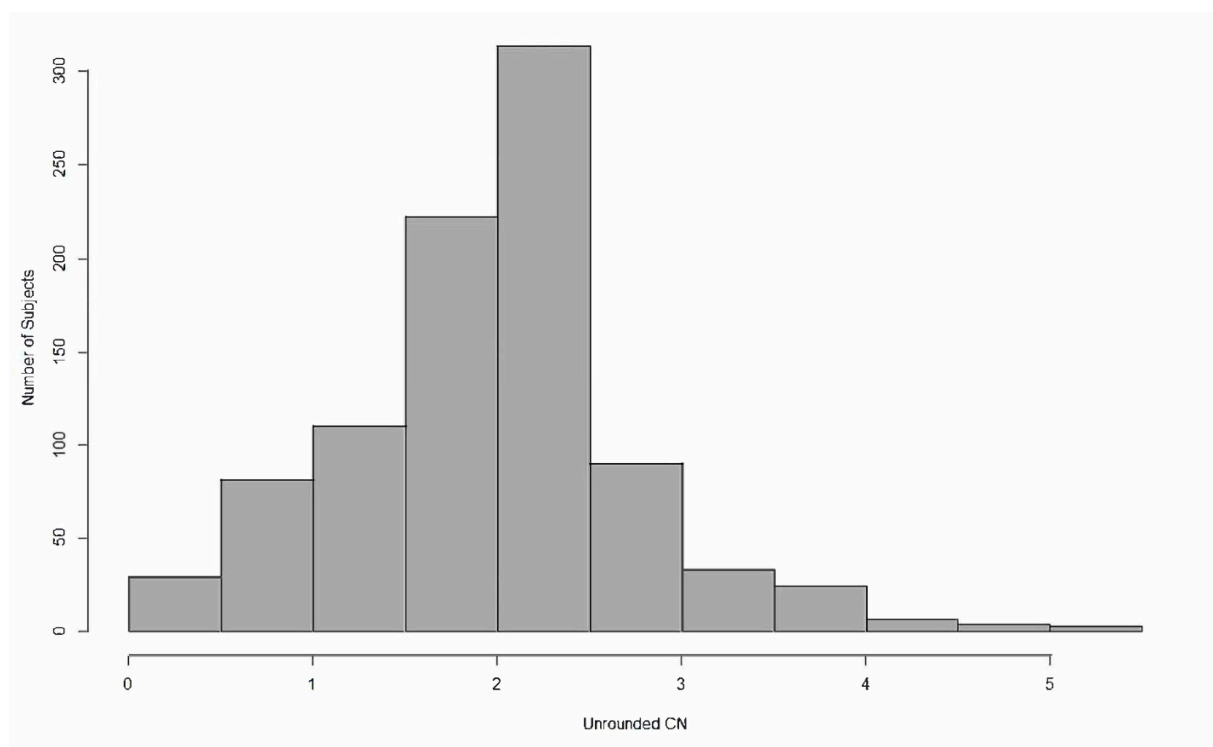

**Supplementary Figure S2:** Histogram of unrounded CNV.
